# Supplementary material for: Slow magnetic relaxation and strong magnetic coupling in the nitroxyl radical complexes of lanthanide(iii) with diamagnetic ground state (Ln = Lu, Eu)
Source: Royal Society of Chemistry journal article supplement (doi:10.1039/d4sc05035e), 2024-11-26
Supplement: d4sc05035e1.pdf [file d4sc05035e1.pdf]

## Electronic Supporting Information on

### **Slow magnetic relaxation and strong magnetic coupling in the nitroxyl radical complexes of Ln(III) with diamagnetic ground state (Ln = Lu, Eu)**

*Lorenzo Sorace,<sup>a</sup> Alexey A. Dmitriev,<sup>b</sup> Mauro Perfetti<sup>a\*</sup> and Kira E. Vostrikova<sup>c\*</sup>*

<sup>a</sup>Department of Chemistry U. Schiff, University of Florence and INSTM Research Unit. Via della Lastruccia 3-13, Sesto Fiorentino 50019, Firenze (IT). ORCID: 0000-0001-5649-0449

<sup>b</sup>Voevodsky Institute of Chemical Kinetics and Combustion, Siberian Branch, Russian Academy of Sciences, 630090 Novosibirsk, Russia.

<sup>c</sup>Nikolaev Institute of Inorganic Chemistry, Siberian Branch, Russian Academy of Sciences.

**Table S1.** Crystallographic data and refinement details for the compounds [LnRad(NO<sub>3</sub>)<sub>3</sub>] (Ln = Eu, Lu).

|                                                                                                      | <b>Eu</b>                                                                                                                                                                                                                                    | <b>Lu</b>                                                                                                                                                                                                                   |
|------------------------------------------------------------------------------------------------------|----------------------------------------------------------------------------------------------------------------------------------------------------------------------------------------------------------------------------------------------|-----------------------------------------------------------------------------------------------------------------------------------------------------------------------------------------------------------------------------|
| Empirical formula                                                                                    | C <sub>15</sub> H <sub>16</sub> N <sub>6</sub> O <sub>11</sub> Eu                                                                                                                                                                            | C <sub>15</sub> H <sub>16</sub> N <sub>6</sub> O <sub>11</sub> Lu                                                                                                                                                           |
| Formula weight                                                                                       | 608.29                                                                                                                                                                                                                                       | 631.29                                                                                                                                                                                                                      |
| Space group                                                                                          | <i>P2<sub>1</sub>/n</i>                                                                                                                                                                                                                      | <i>P2<sub>1</sub>/n</i>                                                                                                                                                                                                     |
| <i>a</i> /Å                                                                                          | 10.0737(2)                                                                                                                                                                                                                                   | 9.9511(2)                                                                                                                                                                                                                   |
| <i>b</i> /Å                                                                                          | 16.5107(4)                                                                                                                                                                                                                                   | 16.4632(4)                                                                                                                                                                                                                  |
| <i>c</i> /Å                                                                                          | 12.7562(2)                                                                                                                                                                                                                                   | 12.8156(3)                                                                                                                                                                                                                  |
| β/°                                                                                                  | 104.639(1)                                                                                                                                                                                                                                   | 104.088(1)                                                                                                                                                                                                                  |
| Volume/Å <sup>3</sup>                                                                                | 2052.79(8)                                                                                                                                                                                                                                   | 2036.39(8)                                                                                                                                                                                                                  |
| <i>Z</i>                                                                                             | 4                                                                                                                                                                                                                                            | 4                                                                                                                                                                                                                           |
| Temperature                                                                                          | 100                                                                                                                                                                                                                                          | 150                                                                                                                                                                                                                         |
| ρ <sub>calc</sub> /cm <sup>3</sup>                                                                   | 1.968                                                                                                                                                                                                                                        | 2.059                                                                                                                                                                                                                       |
| μ/mm <sup>-1</sup>                                                                                   | 3.13                                                                                                                                                                                                                                         | 4.92                                                                                                                                                                                                                        |
| <i>F</i> (000)                                                                                       | 1196.979                                                                                                                                                                                                                                     | 1228.362                                                                                                                                                                                                                    |
| Crystal size/mm <sup>3</sup>                                                                         | 0.1 × 0.05 × 0.03                                                                                                                                                                                                                            | 0.35 × 0.1 × 0.1                                                                                                                                                                                                            |
| 2θ range for data collection/°                                                                       | 4.066 to 51.418                                                                                                                                                                                                                              | 2.05 to 30.50                                                                                                                                                                                                               |
| Index ranges                                                                                         | -14 ≤ <i>h</i> ≤ 17,<br>-29 ≤ <i>k</i> ≤ 29, -22 ≤ <i>l</i> ≤ 22                                                                                                                                                                             | -13 ≤ <i>h</i> ≤ 14,<br>-19 ≤ <i>k</i> ≤ 21, -17 ≤ <i>l</i> ≤ 16                                                                                                                                                            |
| <i>T</i> <sub>min</sub> , <i>T</i> <sub>max</sub>                                                    | 0.56, 0.75                                                                                                                                                                                                                                   | 0.643, 0.746                                                                                                                                                                                                                |
| Reflections collected                                                                                | 52996                                                                                                                                                                                                                                        | 16819                                                                                                                                                                                                                       |
| Independent reflections                                                                              | 12193                                                                                                                                                                                                                                        | 4929                                                                                                                                                                                                                        |
| observed [ <i>I</i> ≥ 2 <i>u</i> ( <i>I</i> )] reflections                                           | 7299                                                                                                                                                                                                                                         | 4513                                                                                                                                                                                                                        |
| <i>R</i> <sub>int</sub> , ( <i>sin</i> θ/λ) <sub>max</sub> (Å <sup>-1</sup> )                        | 0.088, 0.893                                                                                                                                                                                                                                 | 0.028, 0.714                                                                                                                                                                                                                |
| <i>R</i> [ <i>F</i> <sup>2</sup> > 2σ( <i>F</i> <sup>2</sup> )], <i>wR</i> ( <i>F</i> <sup>2</sup> ) | 0.055, 0.120                                                                                                                                                                                                                                 | 0.033, 0.129, 0.94                                                                                                                                                                                                          |
| Restraints/parameters                                                                                | 0/300                                                                                                                                                                                                                                        | 6/300                                                                                                                                                                                                                       |
| H-atom treatment                                                                                     | H-atom parameters constrained<br><i>w</i> = 1/[σ <sup>2</sup> ( <i>F</i> <sub>o</sub> <sup>2</sup> ) + (0.0466 <i>P</i> ) <sup>2</sup> ]<br>where <i>P</i> = ( <i>F</i> <sub>o</sub> <sup>2</sup> + 2 <i>F</i> <sub>c</sub> <sup>2</sup> )/3 | <i>w</i> = 1/[σ <sup>2</sup> ( <i>F</i> <sub>o</sub> <sup>2</sup> ) + (0.0 <i>P</i> ) <sup>2</sup> + 64.6601 <i>P</i> ]<br>where <i>P</i> = ( <i>F</i> <sub>o</sub> <sup>2</sup> + 2 <i>F</i> <sub>c</sub> <sup>2</sup> )/3 |
| Δρ <sub>max</sub> , Δρ <sub>min</sub> (e Å <sup>-3</sup> )                                           | 4.95, -5.52                                                                                                                                                                                                                                  | 2.68, -2.73                                                                                                                                                                                                                 |
| Goodness-of-fit on <i>F</i> <sup>2</sup>                                                             | 1.060                                                                                                                                                                                                                                        | 0.94                                                                                                                                                                                                                        |
| Largest diff. peak/hole / e Å <sup>-3</sup>                                                          | 2.4/-1.1                                                                                                                                                                                                                                     | 2.68/-2.73                                                                                                                                                                                                                  |

**Table S2.** Geometry analysis of the complexes by SHAPE\* software.

|                                           | Temperature of RXD experiment, K | Spherical tricapped trigonal prism, $D_{3h}$ | Spherical capped square antiprism, $C_{4v}$ | Muffin, $C_s$ |
|-------------------------------------------|----------------------------------|----------------------------------------------|---------------------------------------------|---------------|
| [Eu(Tpm)(NO <sub>3</sub> ) <sub>3</sub> ] | 150                              | 2.05                                         | 2.910                                       | 3.027         |
| [Eu(Rad)(NO <sub>3</sub> ) <sub>3</sub> ] | 100                              | 2.385                                        | 3.191                                       | 3.338         |
| [Y(Rad)(NO <sub>3</sub> ) <sub>3</sub> ]  | 295                              | 2.141                                        | 2.935                                       | 3.171         |
| [Dy(Rad)(NO <sub>3</sub> ) <sub>3</sub> ] | 295                              | 2.220                                        | 3.025                                       | 3.256         |

\*SHAPE 2.1 program for the stereochemical analysis of molecular fragments by means of continuous shape measures and associated tools. <http://www.ee.ub.edu/>

**Table S3.** Selected bond lengths (Å) in coordination sphere of the compounds [LnRad(NO<sub>3</sub>)<sub>3</sub>], Ln = Eu, Lu.

| Eu     |           | Lu     |             |
|--------|-----------|--------|-------------|
| Bond   | Length    | Bond   | Length      |
| Eu1—O2 | 2.424 (2) | Lu1—O2 | 2.3351 (13) |
| Eu1—O4 | 2.445 (3) | Lu1—O3 | 2.3719 (14) |
| Eu1—O5 | 2.488 (3) | Lu1—O4 | 2.3899 (15) |
| Eu1—O6 | 2.425 (2) | Lu1—O5 | 2.3490 (14) |
| Eu1—O7 | 2.489 (3) | Lu1—O6 | 2.3989 (15) |
| Eu1—O8 | 2.433 (2) | Lu1—O7 | 2.3750 (14) |
| Eu1—O9 | 2.466 (2) | Lu1—O8 | 2.3611 (15) |
| Eu1—N2 | 2.531 (3) | Lu1—N2 | 2.4373 (16) |
| Eu1—N3 | 2.533 (3) | Lu1—N3 | 2.4319 (16) |
| N1—O2  | 1.242 (2) | N1—O2  | 1.276 (2)   |

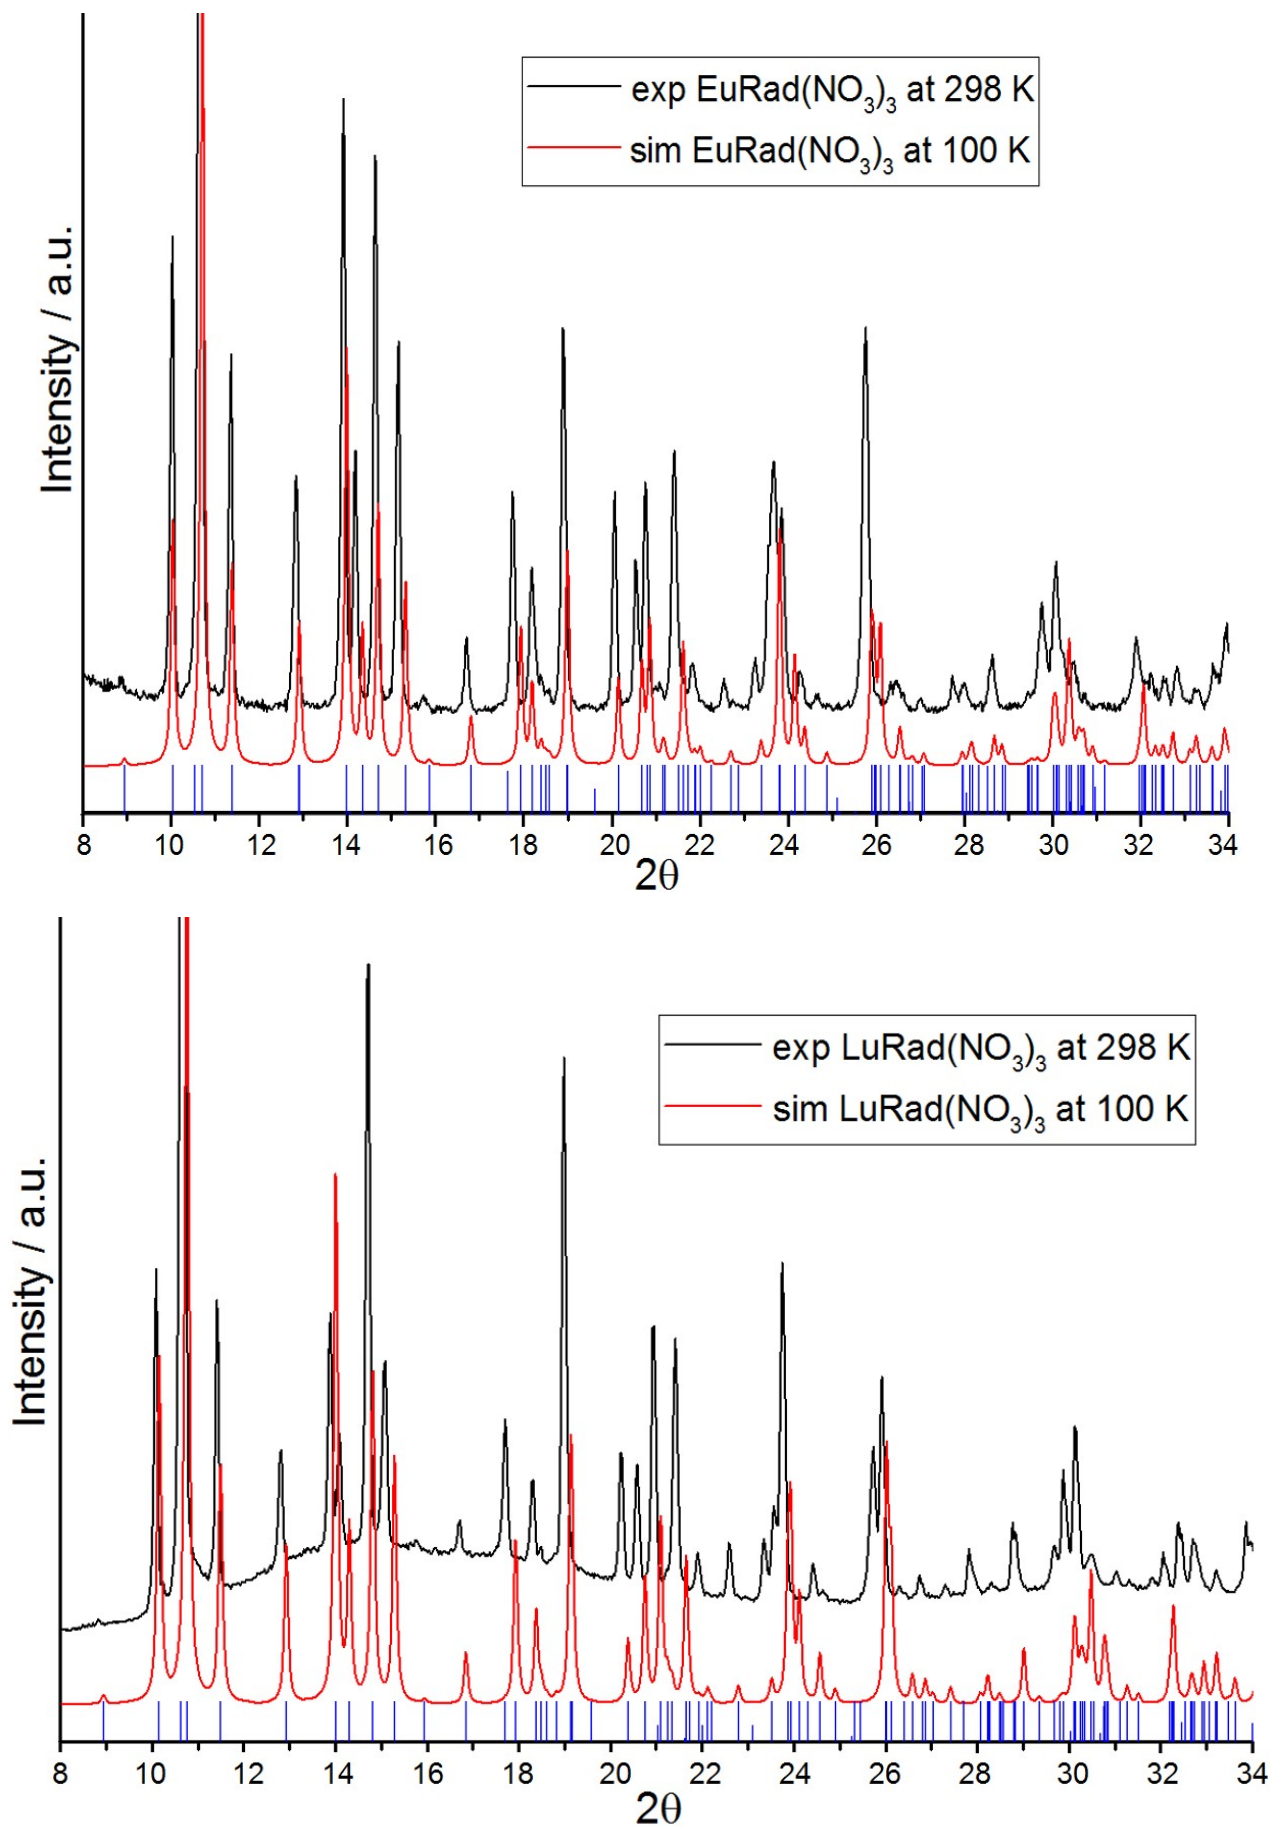

**Figure S1.** Simulated (red) and experimental (black) powder patterns of the compounds  $[\text{LnRad}(\text{NO}_3)_3]$ .

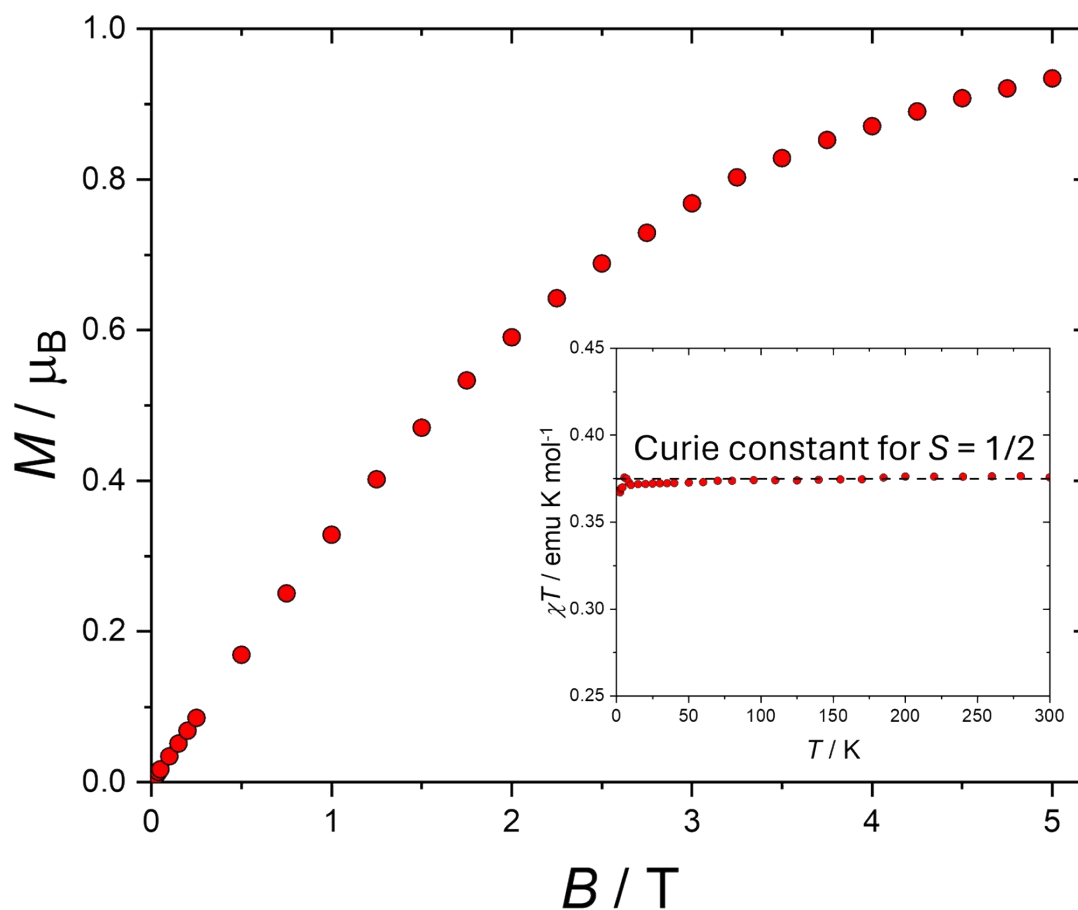

**Figure S2.** Magnetic behavior of  $[\text{LuRad}(\text{NO}_3)_3]$ : magnetization curve measured at 2 K and temperature dependence of  $\chi T$  product (inset) at  $B = 1$  T.

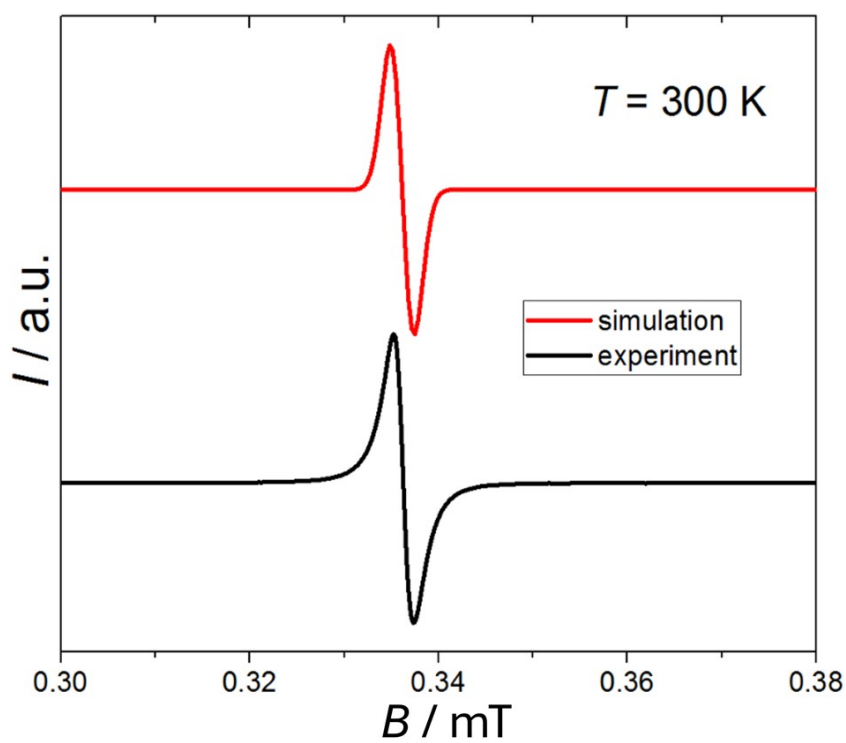

**Figure S3.** The powder X-band EPR spectrum of  $[\text{LuRad}(\text{NO}_3)_3]$  at  $T=300\text{K}$  with its simulation using an isotropic  $g=1.998(1)$ .

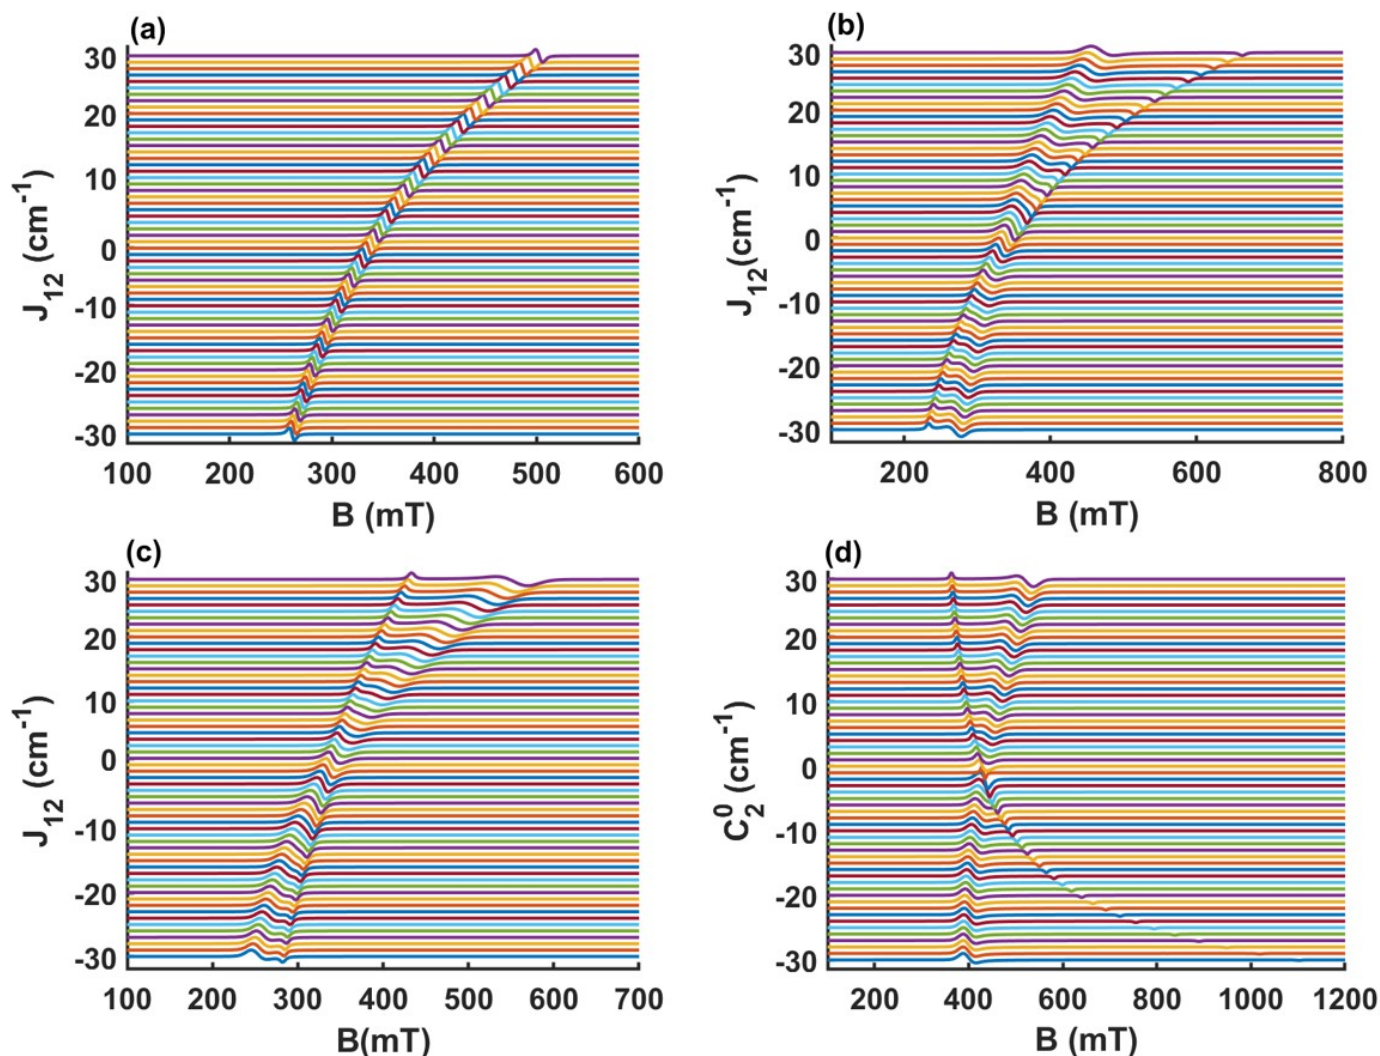

**Figure S4** Survey of the simulated EPR spectra ( $\nu = 9.39$  GHz,  $T = 5$  K) as a function of different parameters. a)  $C_2^0 = 0$  and  $J$  varying from  $-30$   $\text{cm}^{-1}$  (ferromagnetic) to  $+30$   $\text{cm}^{-1}$  (antiferromagnetic) b)  $C_2^0 = -10$   $\text{cm}^{-1}$  and  $J_{12}$  varying from  $-30$   $\text{cm}^{-1}$  (ferromagnetic) to  $+30$   $\text{cm}^{-1}$  (antiferromagnetic) c)  $C_2^0 = +10$   $\text{cm}^{-1}$  and  $J_{12}$  varying from  $-30$   $\text{cm}^{-1}$  (ferromagnetic) to  $+30$   $\text{cm}^{-1}$  (antiferromagnetic) d)  $J_{12} = +20$   $\text{cm}^{-1}$  (antiferromagnetic) and  $C_2^0$  varying from  $-30$   $\text{cm}^{-1}$  to  $+30$   $\text{cm}^{-1}$ .

### EPR Simulation

Spin structure used for the Easy Spin script:

```

Sys.S=[3 3 1/2];
Sys.g=[gfree 1 1.998];
Sys.B2=[0 ;14; 0]*clight*10-4;
Sys.J=[370 19.5 0] *clight*10-4;
Sys.lw=[1 6];
Sys.HStrain=[600 600 100];

```

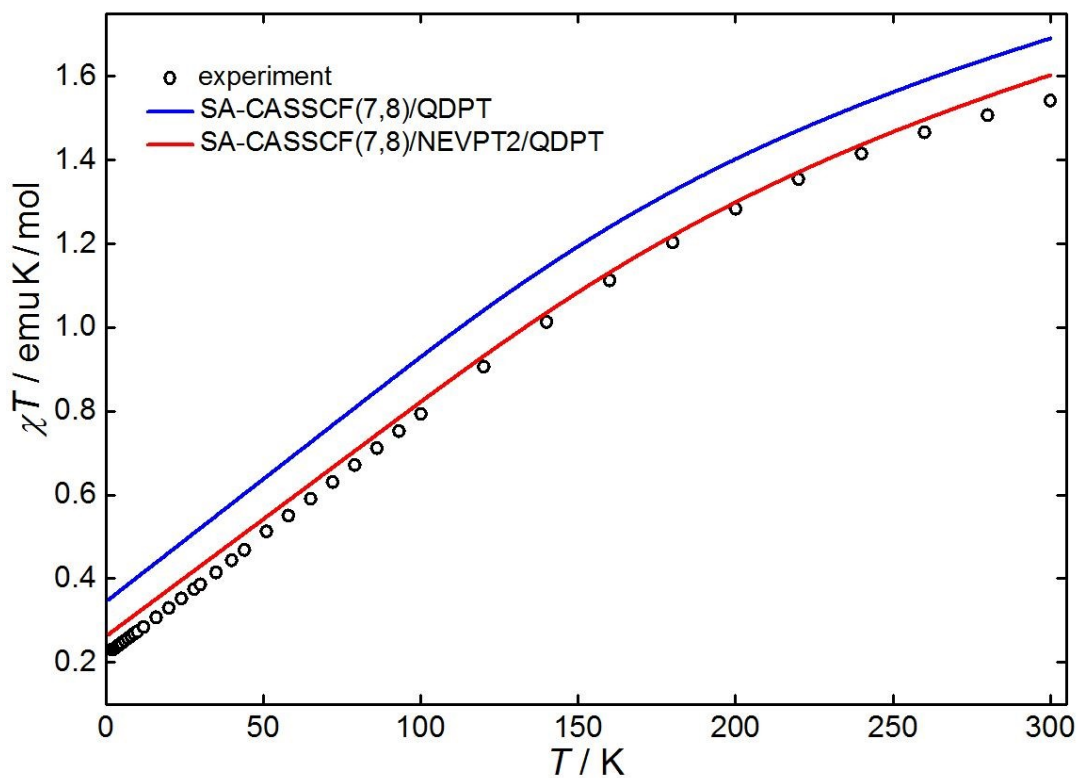

**Figure S5.** Temperature dependence of magnetic susceptibility for  $[\text{EuRad}(\text{NO}_3)_3]$ : experiment (circles) and *ab initio* calculations, SA-CASSCF(7,8)/QDPT (blue) and SA-CASSCF(7,8)/NEVPT2/QDPT (red).

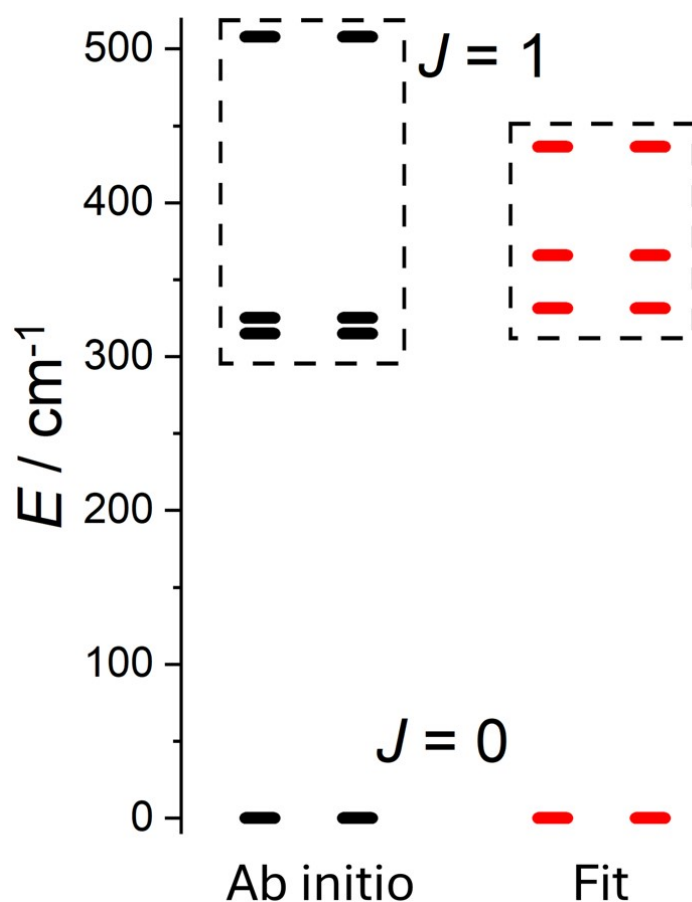

**Figure S6.** Visual comparison of the energy level structure of the ground and first excited multiplet of  $[\text{EuRad}(\text{NO}_3)_3]$ , obtained from the experimental magnetic and EPR data fit and *ab initio* (see below). The doubly degenerate nature of the states in zero field stems from the coupling between the  $\text{Eu}^{3+}$  ion and Rad.

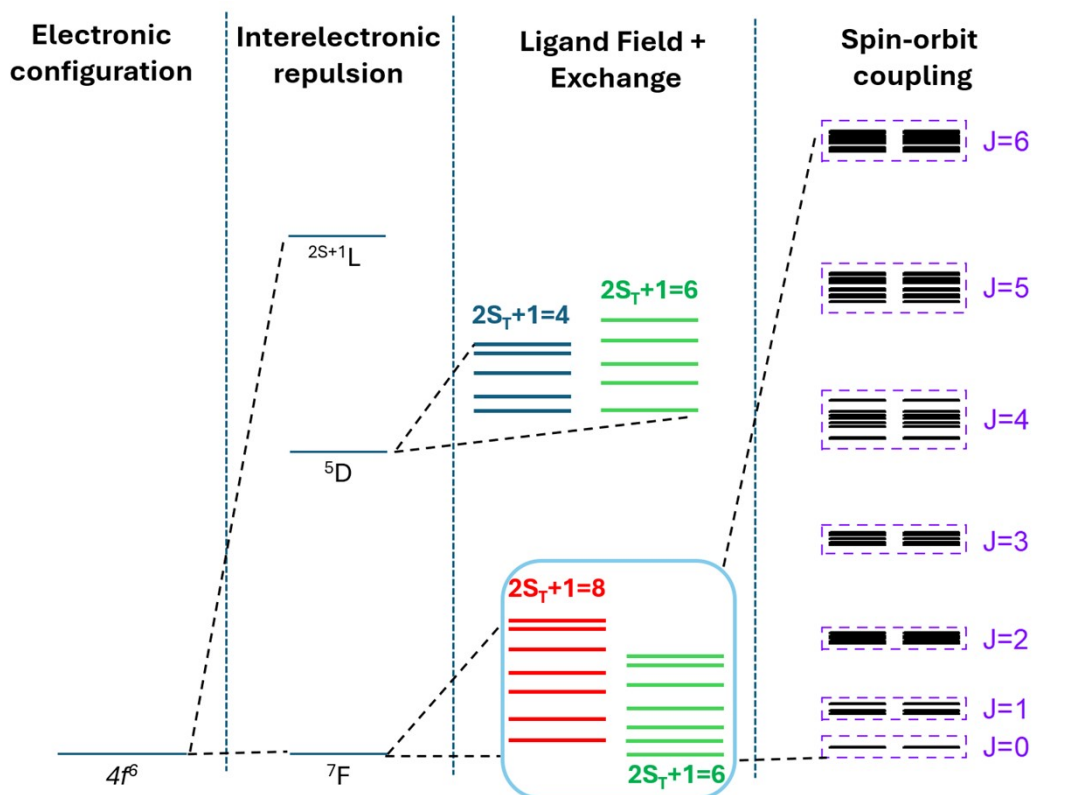

**Figure S7** Plot of the different electronic energy terms for  $[EuRad(NO_3)_3]$  included in the calculations. Energy is not in scale.

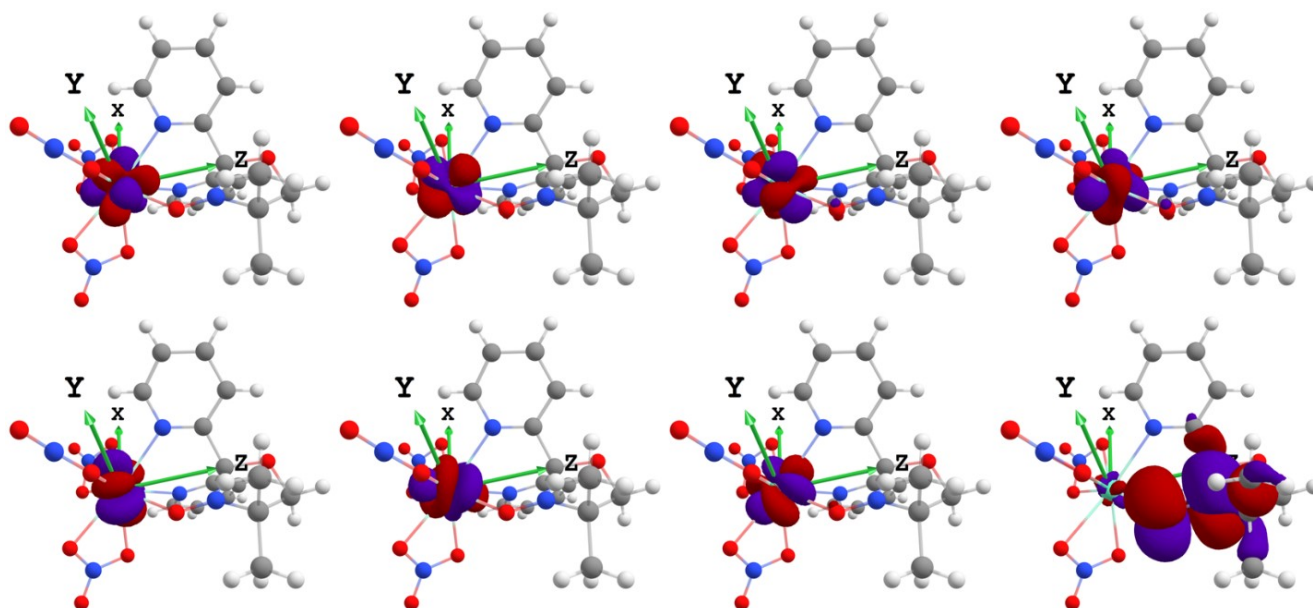

**Figure S8.** MOs involved in the active space of the SA-CASSCF(7,8) calculations on complex  $[EuRad(NO_3)_3]$  (7 octets, 12 sextets and 5 quartets were involved in the SA). Geometry corresponds to the SCXRD structure at 100 K.



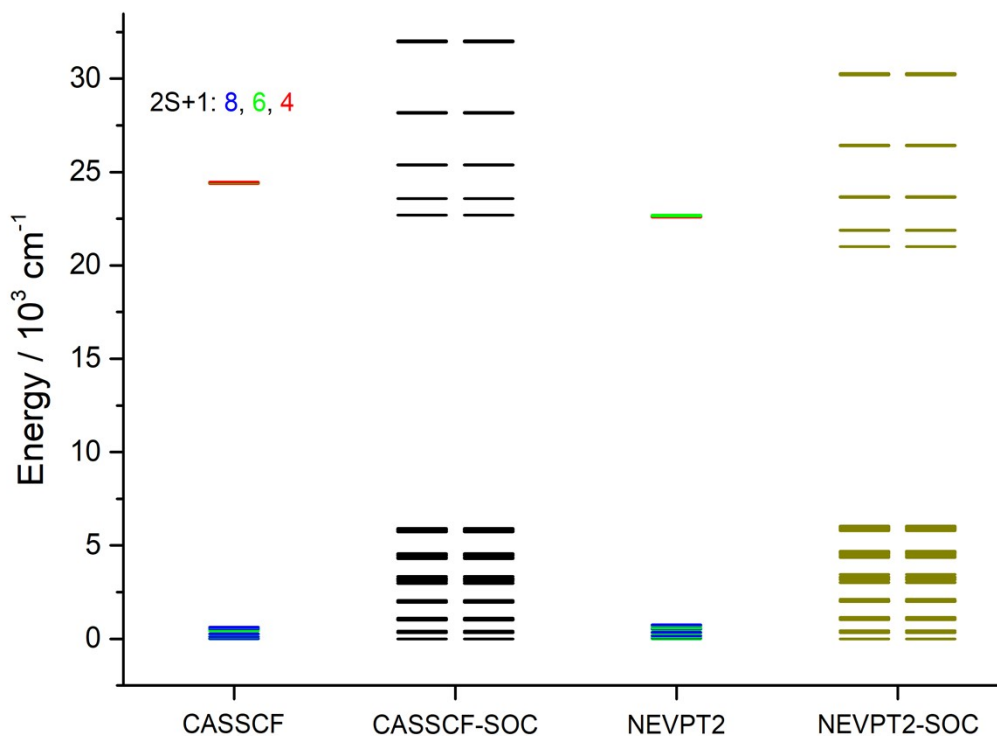

**Figure S9.** Relative states energies of [EuRad(NO<sub>3</sub>)<sub>3</sub>] calculated at SA-CASSCF(7,8) (CASSCF), SA-CASSCF(7,8)/QDPT (CASSCF-SOC), SA-CASSCF(7,8)/NEVPT2 (NEVPT2) and SA-CASSCF(7,8)/NEVPT2/QDPT (NEVPT2-SOC) levels of theory with 7, 12 and 5 roots for the multiplicities of 8 (blue), 6 (green) and 4 (red), correspondingly.

**Table S4.** Lowest octets and sextets after SA-CASSCF(7,8) calculations (7 octets, 12 sextets, 5 quintets) with their energies and contributions (> 0.1) of different electronic configurations to the wavefunction of each root.

| Octets |                |                               |                                  | Sextets |               |                               |                                   |
|--------|----------------|-------------------------------|----------------------------------|---------|---------------|-------------------------------|-----------------------------------|
| Root   | Energy, Eh     | Contribution                  | Electronic configuration         | Root    | Energy, Eh    | Contribution                  | Electronic configuration          |
| 0      | -12562.7830773 | 0.89166                       | 11111110 <sup>a</sup>            | 0       | -12562.783133 | 0.84855<br>0.10606            | 11111110 <sup>a</sup><br>11111101 |
| 1      | -12562.782621  | 0.89100                       | 11111101                         | 1       | -12562.782697 | 0.84936<br>0.11577            | 11111101<br>11111110              |
| 2      | -12562.781904  | 0.96640                       | 11111011                         | 2       | -12562.781994 | 0.94191                       | 11111011                          |
| 3      | -12562.781218  | 0.70813<br>0.19771            | 11110111<br>11101111             | 3       | -12562.781243 | 0.62144<br>0.17981<br>0.14473 | 11110111<br>11011111<br>11101111  |
| 4      | -12562.780912  | 0.89390                       | 11011111                         | 4       | -12562.780934 | 0.71024<br>0.11991            | 11011111<br>10111111              |
| 5      | -12562.780718  | 0.41834<br>0.28881<br>0.25590 | 11101111<br>10111111<br>11110111 | 5       | -12562.780800 | 0.38237<br>0.29453<br>0.23064 | 11101111<br>11110111<br>10111111  |
| 6      | -12562.780327  | 0.64146<br>0.33765            | 10111111<br>11101111             | 6       | -12562.780377 | 0.59351<br>0.36540            | 10111111<br>11101111              |

<sup>a</sup> 1<sup>st</sup> number – radical ligand SOMO, 2-8 numbers – europium 4f-orbitals.

Table S4 presents the lowest seven octets and sextets with the contributions of different electronic configurations to the wavefunction of each root. Most of them have dominant contribution of one electronic configuration, and only fifth octet and fifth sextet have stronger multireference nature with close contributions of three configurations. SOMO of radical is always populated by one electron and the difference in configurations is defined by redistribution of electrons between seven 4f-orbitals of europium. The wavefunctions of the highest five sextets and quartets have much stronger multireference nature with bunch of different configurations with contributions lower than 10%. After account of SOC in QDPT approach, the energy levels are Kramers doublets, the lowest states can be roughly grouped as a result of interaction between the Eu(III) states with full moment J=0-6 after split in the ligand field and doublet of radical ligand (Figure S9, purple designations). The wavefunctions of these spin-free states are the combination of number of states with different  $M_S$  and weights of their contributions are rather small, no more that 10-15 %.

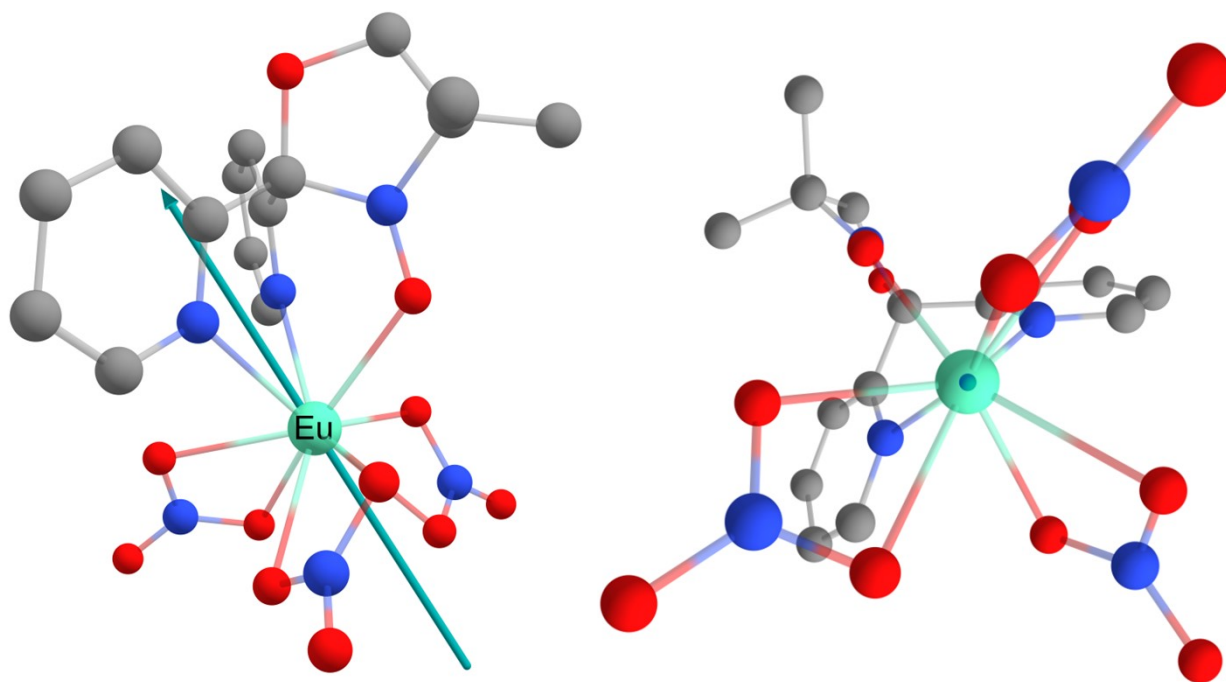

**Figure S10.** The orientation of the *ab initio* calculated main magnetic axis (teal vector) of the ground Kramer's doublet for  $[\text{EuRad}(\text{NO}_3)_3]$  complex. The view along the main magnetic axis (right). The hydrogens are omitted.

**Table S5.** Angles between the main magnetic axes of excited Kramer's doublets and the main magnetic axis of the ground state Kramer doublet (KD) calculated for  $[\text{EuRad}(\text{NO}_3)_3]$ .

| KDs              | 1 | 2    | 3    | 4    | 5    | 6    | 7    | 8    | 9    |
|------------------|---|------|------|------|------|------|------|------|------|
| $\angle, ^\circ$ | 0 | 96.6 | 10.2 | 27.6 | 95.3 | 23.1 | 17.6 | 49.3 | 65.5 |

**Table S6.** Principal values of g-tensor of *nine* lowest Kramers doublets with the direction of the main magnetic axes.

| KD | Principal values |         | Main Magnetic Axes |           |           |           |
|----|------------------|---------|--------------------|-----------|-----------|-----------|
|    |                  |         |                    | x         | y         | z         |
| 1  | $g_x$            | 1.58658 | Xm                 | -0.467008 | 0.820432  | 0.329839  |
|    | $g_y$            | 1.64033 | Ym                 | -0.753578 | -0.564424 | 0.336966  |
|    | $g_z$            | 1.77790 | Zm                 | 0.462627  | -0.091193 | 0.881850  |
| 2  | $g_x$            | 1.13170 | Xm                 | 0.390610  | -0.004972 | 0.920543  |
|    | $g_y$            | 1.63800 | Ym                 | 0.792705  | 0.510219  | -0.333610 |
|    | $g_z$            | 2.28735 | Zm                 | -0.468020 | 0.860030  | 0.203239  |
| 3  | $g_x$            | 1.72106 | Xm                 | -0.489338 | 0.858319  | 0.154393  |
|    | $g_y$            | 2.11457 | Ym                 | -0.802109 | -0.512447 | 0.306625  |
|    | $g_z$            | 2.68229 | Zm                 | 0.342301  | 0.026203  | 0.939225  |
| 4  | $g_x$            | 2.01471 | Xm                 | 0.709929  | 0.106676  | -0.696147 |
|    | $g_y$            | 2.03138 | Ym                 | 0.233668  | 0.896792  | 0.375717  |
|    | $g_z$            | 2.10975 | Zm                 | 0.664379  | -0.429399 | 0.611732  |
| 5  | $g_x$            | 1.65478 | Xm                 | 0.839347  | 0.005668  | -0.543566 |
|    | $g_y$            | 1.54038 | Ym                 | 0.040171  | 0.996565  | 0.072422  |
|    | $g_z$            | 0.42156 | Zm                 | 0.542109  | -0.082623 | 0.836236  |
| 6  | $g_x$            | 1.20483 | Xm                 | -0.688982 | -0.355462 | 0.631625  |
|    | $g_y$            | 1.45308 | Ym                 | 0.452707  | -0.891624 | -0.007966 |
|    | $g_z$            | 3.13812 | Zm                 | 0.566003  | 0.280453  | 0.775233  |
| 7  | $g_x$            | 2.84594 | Xm                 | 0.536024  | 0.200030  | 0.820162  |
|    | $g_y$            | 2.09875 | Ym                 | 0.575316  | 0.624432  | -0.528296 |
|    | $g_z$            | 1.31875 | Zm                 | -0.617811 | 0.755031  | 0.219630  |
| 8  | $g_x$            | 1.60636 | Xm                 | -0.793362 | -0.461300 | -0.397215 |
|    | $g_y$            | 2.07256 | Ym                 | 0.484735  | -0.873441 | 0.046192  |
|    | $g_z$            | 2.91372 | Zm                 | -0.368252 | -0.155897 | 0.916563  |
| 9  | $g_x$            | 2.90094 | Xm                 | 0.631743  | -0.772924 | 0.059062  |
|    | $g_y$            | 2.68506 | Ym                 | 0.770056  | 0.634489  | 0.066613  |
|    | $g_z$            | 2.00105 | Zm                 | -0.088961 | 0.003398  | 0.996029  |

**Table S7.** Topological properties (a.u.) of the electron density computed at BCP's for the presented bonds in [EuRad(NO<sub>3</sub>)<sub>3</sub>] complex. The wavefunction after *SA-CASSCF(7,8)* calculation was used for the analysis.

| Bond                  | d, Å  | <i>P</i> | $\rho(r)$ | $\nabla^2\rho(r)$ | <i>H(r)</i> | $ V(r) /G(r)$ | $\varepsilon$ | $\eta$ |
|-----------------------|-------|----------|-----------|-------------------|-------------|---------------|---------------|--------|
| Eu-O <sub>trip</sub>  | 2.424 | 0.19     | 0.046     | 0.215             | 2.9e-4      | 0.994         | 0.0442        | 0.1813 |
| Eu-N1 <sub>trip</sub> | 2.534 | 0.20     | 0.044     | 0.161             | -1.7e-3     | 1.041         | 0.0397        | 0.2022 |
| Eu-N2 <sub>trip</sub> | 2.531 | 0.21     | 0.044     | 0.162             | -1.8e-3     | 1.041         | 0.0373        | 0.2021 |
| Eu-O1                 | 2.444 | 0.34     | 0.047     | 0.204             | -1.3e-3     | 1.025         | 0.0650        | 0.1898 |
| Eu-O2                 | 2.489 | 0.33     | 0.042     | 0.186             | -1.3e-4     | 1.003         | 0.0519        | 0.1854 |
| Eu-O3                 | 2.425 | 0.37     | 0.049     | 0.214             | -1.8e-3     | 1.032         | 0.0811        | 0.1919 |
| Eu-O4                 | 2.489 | 0.30     | 0.042     | 0.187             | 5e-5        | 0.999         | 0.0531        | 0.1836 |
| Eu-O5                 | 2.433 | 0.35     | 0.048     | 0.210             | -1.7e-3     | 1.031         | 0.0821        | 0.1919 |
| Eu-O6                 | 2.464 | 0.32     | 0.045     | 0.197             | -6.3e-4     | 1.013         | 0.0633        | 0.1880 |

*P* – Mayer bond order;  $\rho(r)$  – electron density;  $-\nabla^2\rho(r)$  Laplacian of the electron density; *H(r)* – total energy density; *V(r)* – potential energy density; *G(r)* – Lagrangian kinetic energy density;  $\varepsilon$  – ellipticity of electron density;  $\eta$  – eta index.

**Table S8.** Topological properties (a.u.) of the electron density computed at BCP's for the presented bonds in [Eu(Tpm)(NO<sub>3</sub>)<sub>3</sub>] complex. The wavefunction after *SA-CASSCF(6,7)* calculation was used for the analysis.

| Bond                  | d, Å  | <i>P</i> | $\rho(r)$ | $\nabla^2\rho(r)$ | <i>H(r)</i> | $ V(r) /G(r)$ | $\varepsilon$ | $\eta$ |
|-----------------------|-------|----------|-----------|-------------------|-------------|---------------|---------------|--------|
| Eu-N1 <sub>trip</sub> | 2.672 | 0.1      | 0.032     | 0.117             | 6.1e-4      | 0.979         | 0.0610        | 0.1940 |
| Eu-N2 <sub>trip</sub> | 2.663 | 0.1      | 0.032     | 0.120             | 6.2e-4      | 0.979         | 0.0569        | 0.1928 |
| Eu-N3 <sub>trip</sub> | 2.655 | 0.1      | 0.033     | 0.122             | 4.8e-4      | 0.984         | 0.0696        | 0.1947 |
| Eu-O1                 | 2.497 | 0.34     | 0.042     | 0.180             | -0.7e-4     | 1.002         | 0.0726        | 0.1877 |
| Eu-O2                 | 2.509 | 0.31     | 0.040     | 0.176             | 2.7e-4      | 0.994         | 0.0480        | 0.1853 |
| Eu-O3                 | 2.480 | 0.33     | 0.043     | 0.187             | -4.7e-4     | 1.010         | 0.0712        | 0.1903 |
| Eu-O4                 | 2.536 | 0.34     | 0.038     | 0.165             | 8.6e-4      | 0.979         | 0.0336        | 0.1797 |
| Eu-O5                 | 2.459 | 0.33     | 0.046     | 0.197             | -9.9e-4     | 1.020         | 0.0732        | 0.1909 |
| Eu-O6                 | 2.500 | 0.29     | 0.041     | 0.180             | 1.6e-4      | 0.996         | 0.054         | 0.1858 |

*P* – Mayer bond order;  $\rho(r)$  – electron density;  $-\nabla^2\rho(r)$  Laplacian of the electron density; *H(r)* – total energy density; *V(r)* – potential energy density; *G(r)* – Lagrangian kinetic energy density;  $\varepsilon$  – ellipticity of electron density;  $\eta$  – eta index.

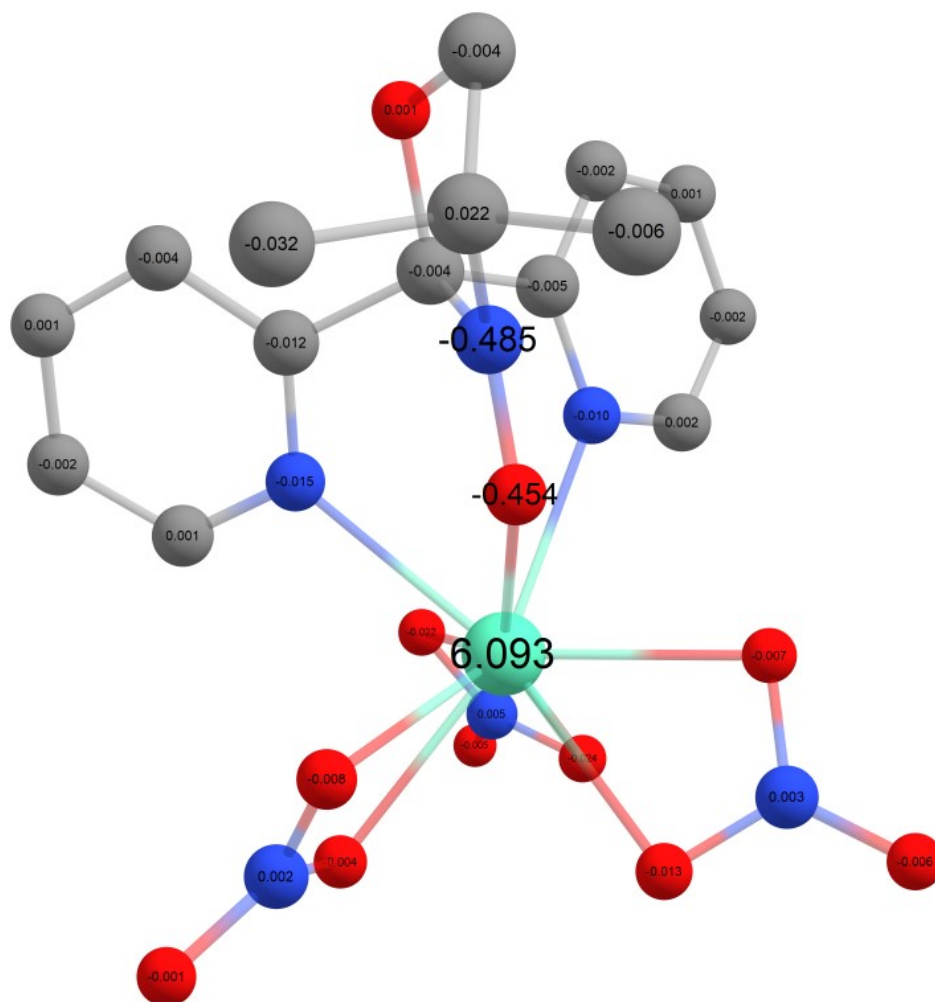

**Figure S11.** Spin density map for [EuRad(NO<sub>3</sub>)<sub>3</sub>] calculated for the ground sextet at UB3LYP/def2-TZVP level with SARC2-DKH-QZVP basis set for Eu and relativistic DKH2 Hamiltonian.

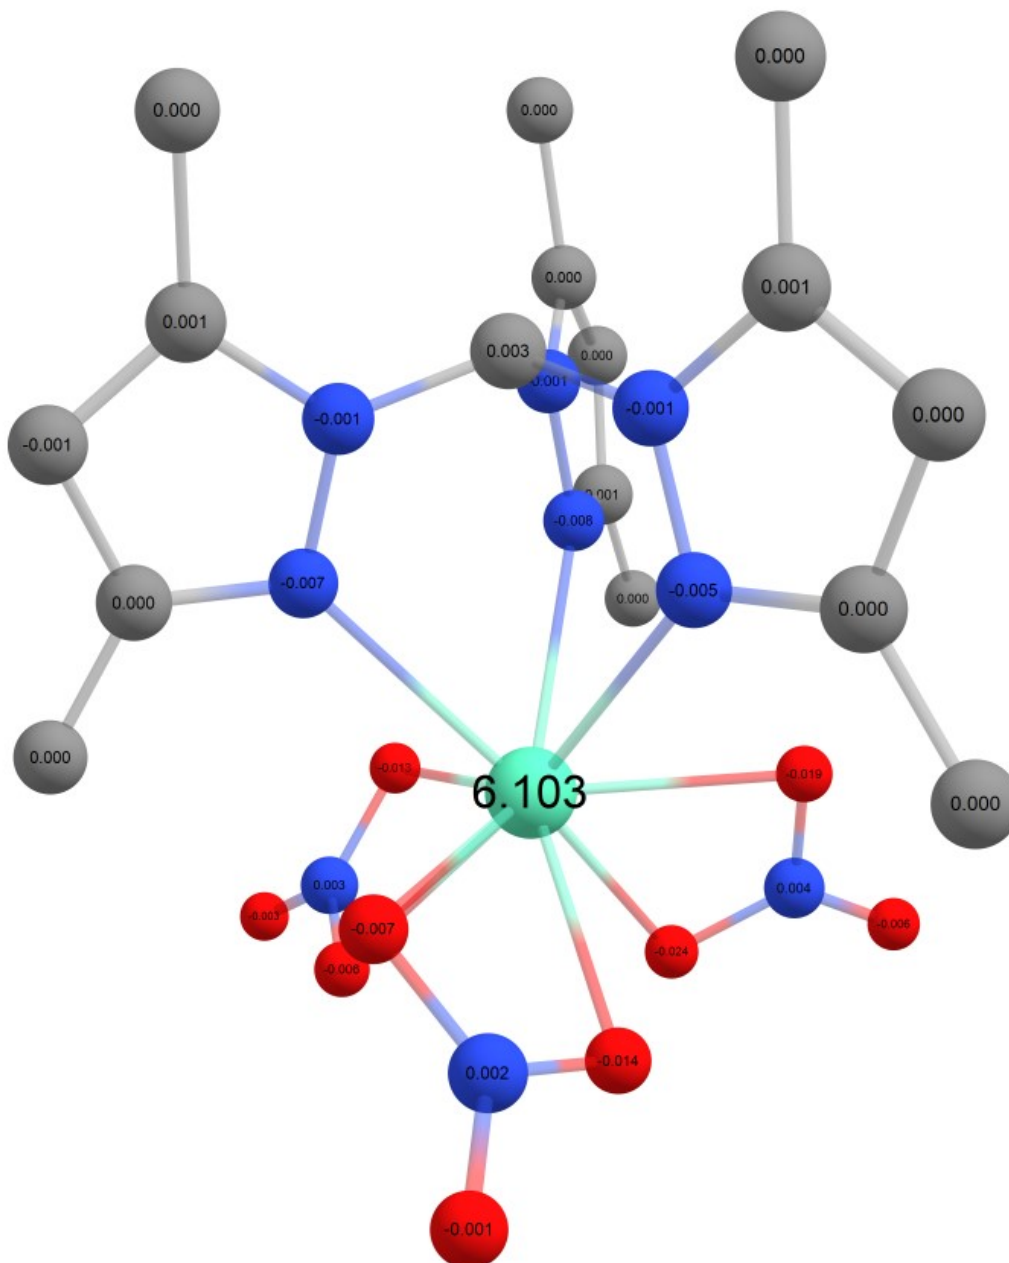

**Figure S12.** Spin density map for the  $[\text{Eu}(\text{Tpm})(\text{NO}_3)_3]$  complex calculated in the ground septet at UB3LYP/def2-TZVP level with SARC2-DKH-QZVP basis set for Eu and relativistic DKH2 Hamiltonian.

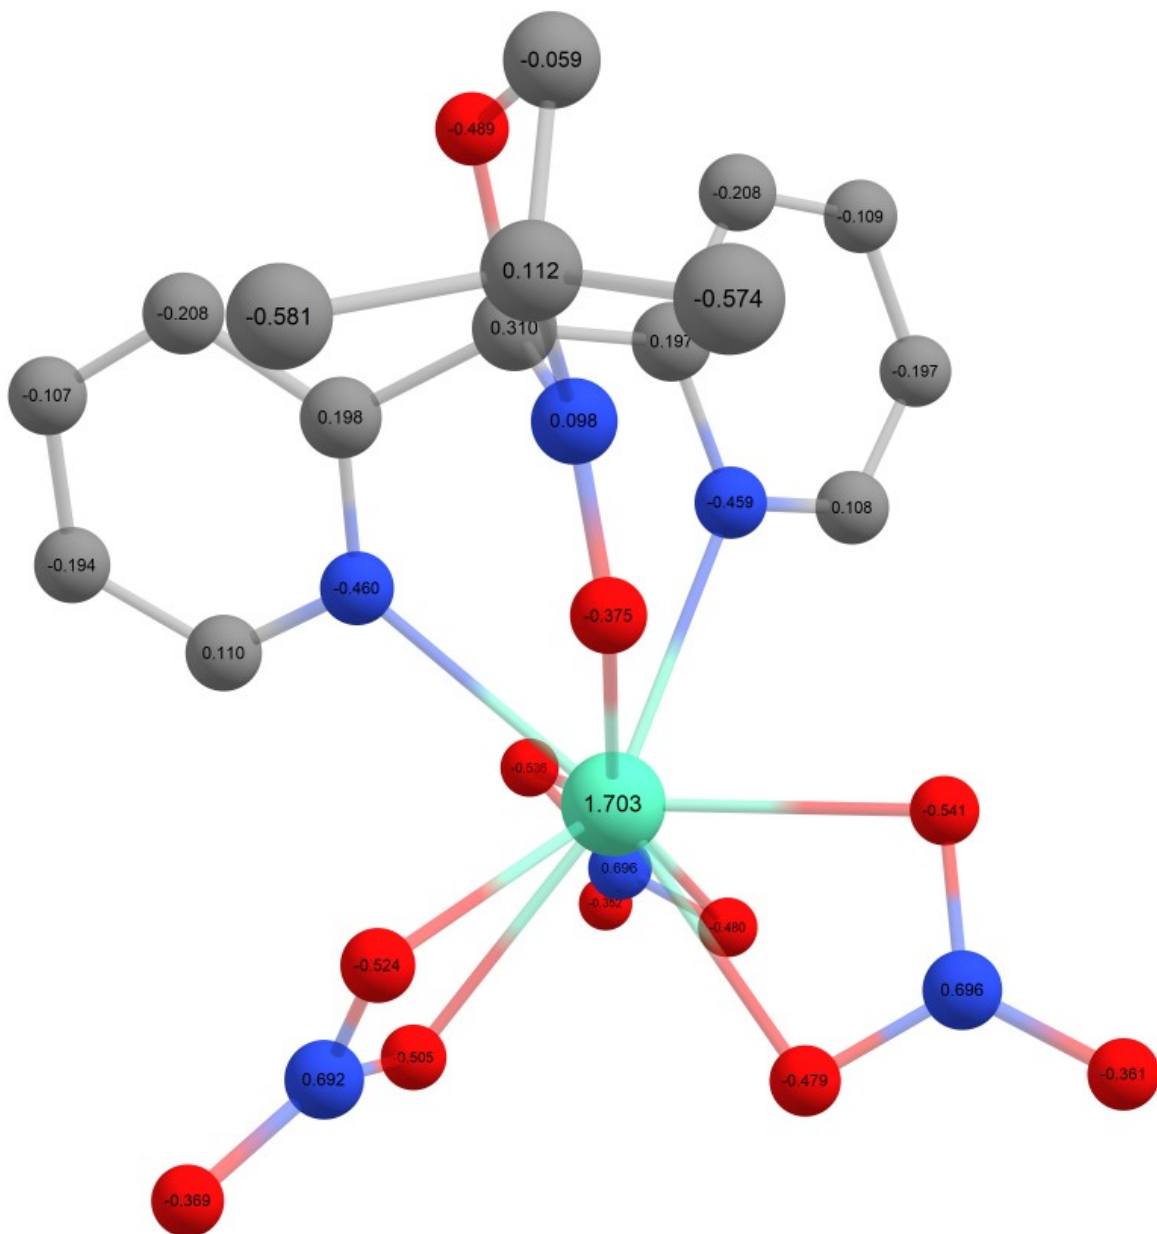

**Figure S13.** Natural charge distribution for [EuRad(NO<sub>3</sub>)<sub>3</sub>] calculated for the ground sextet at UB3LYP/def2-TZVP level with SARC2-DKH-QZVP basis set for Eu and relativistic DKH2 Hamiltonian.

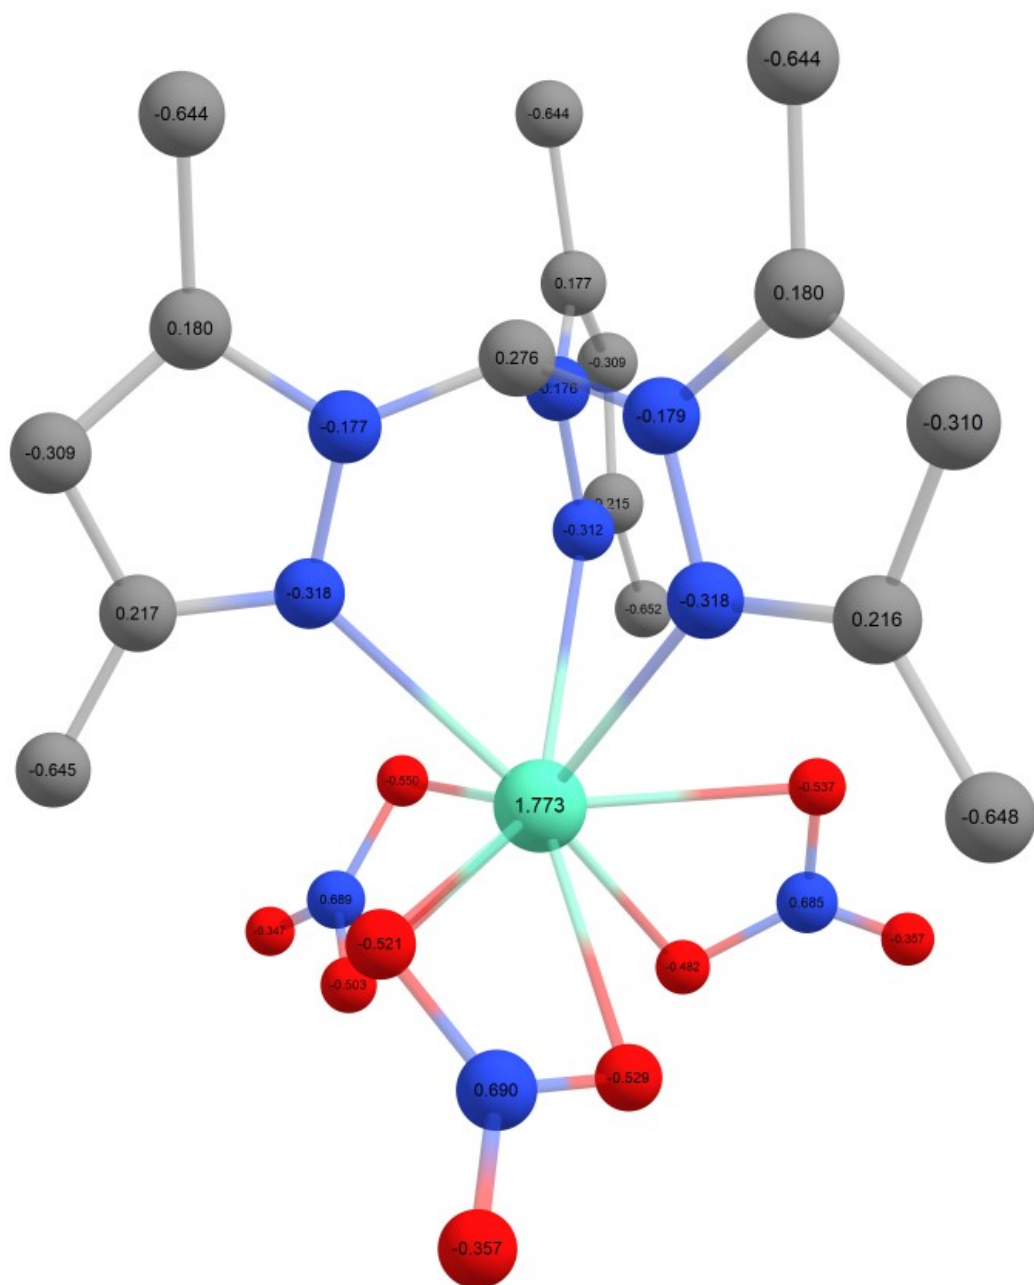

**Figure S14.** Natural charges distribution in [Eu(Tpm)(NO<sub>3</sub>)<sub>3</sub>] calculated in the ground septet at UB3LYP/def2-TZVP level with SARC2-DKH-QZVP basis set for Eu and relativistic DKH2 Hamiltonian.



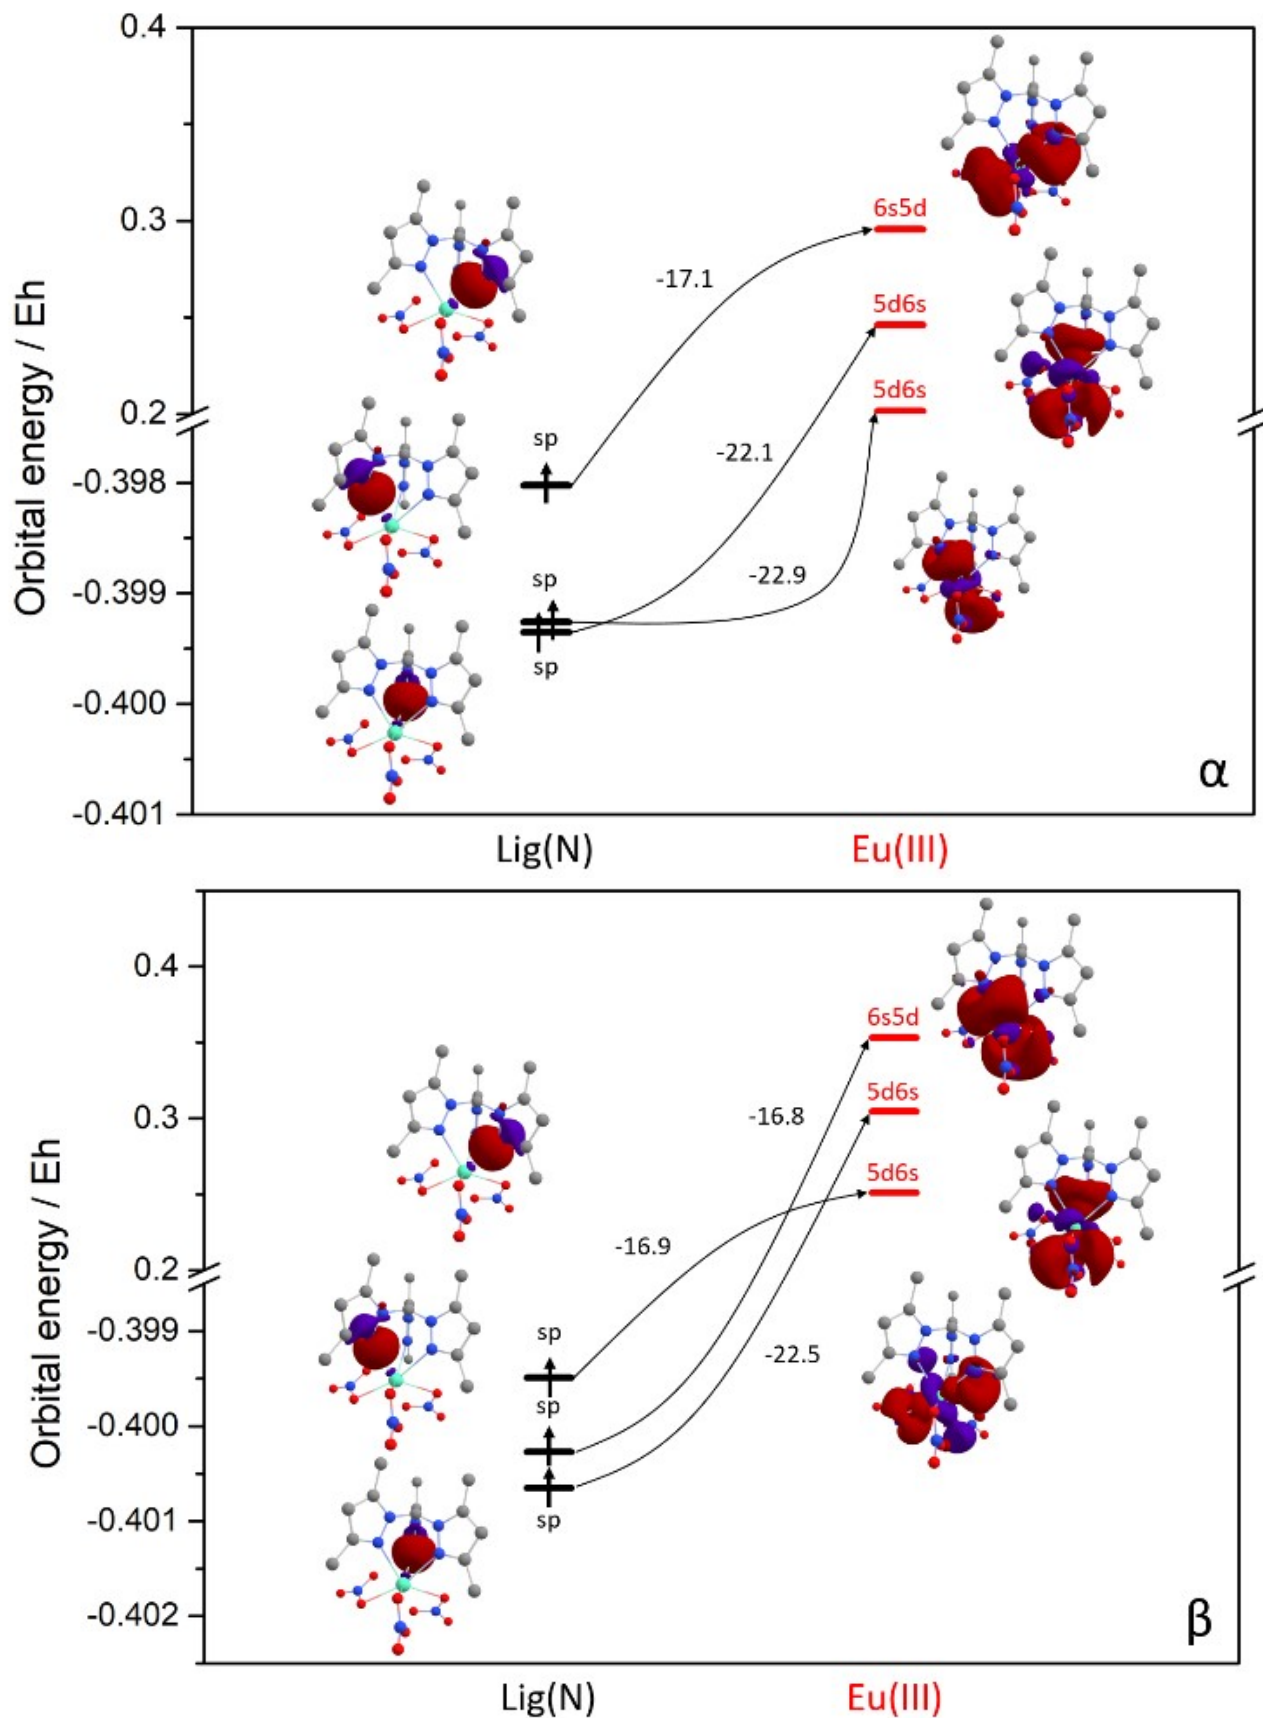

**Figure S15.** Orbital energy diagrams for the bond formation in the  $[\text{Eu}(\text{Tpm})(\text{NO}_3)_3]$  complex between  $\text{Eu}^{3+}$  and  $L_{\text{dia}}$  ligand, the main electron donation paths are presented. The values of these individual components can be found in Table 2 (main text).

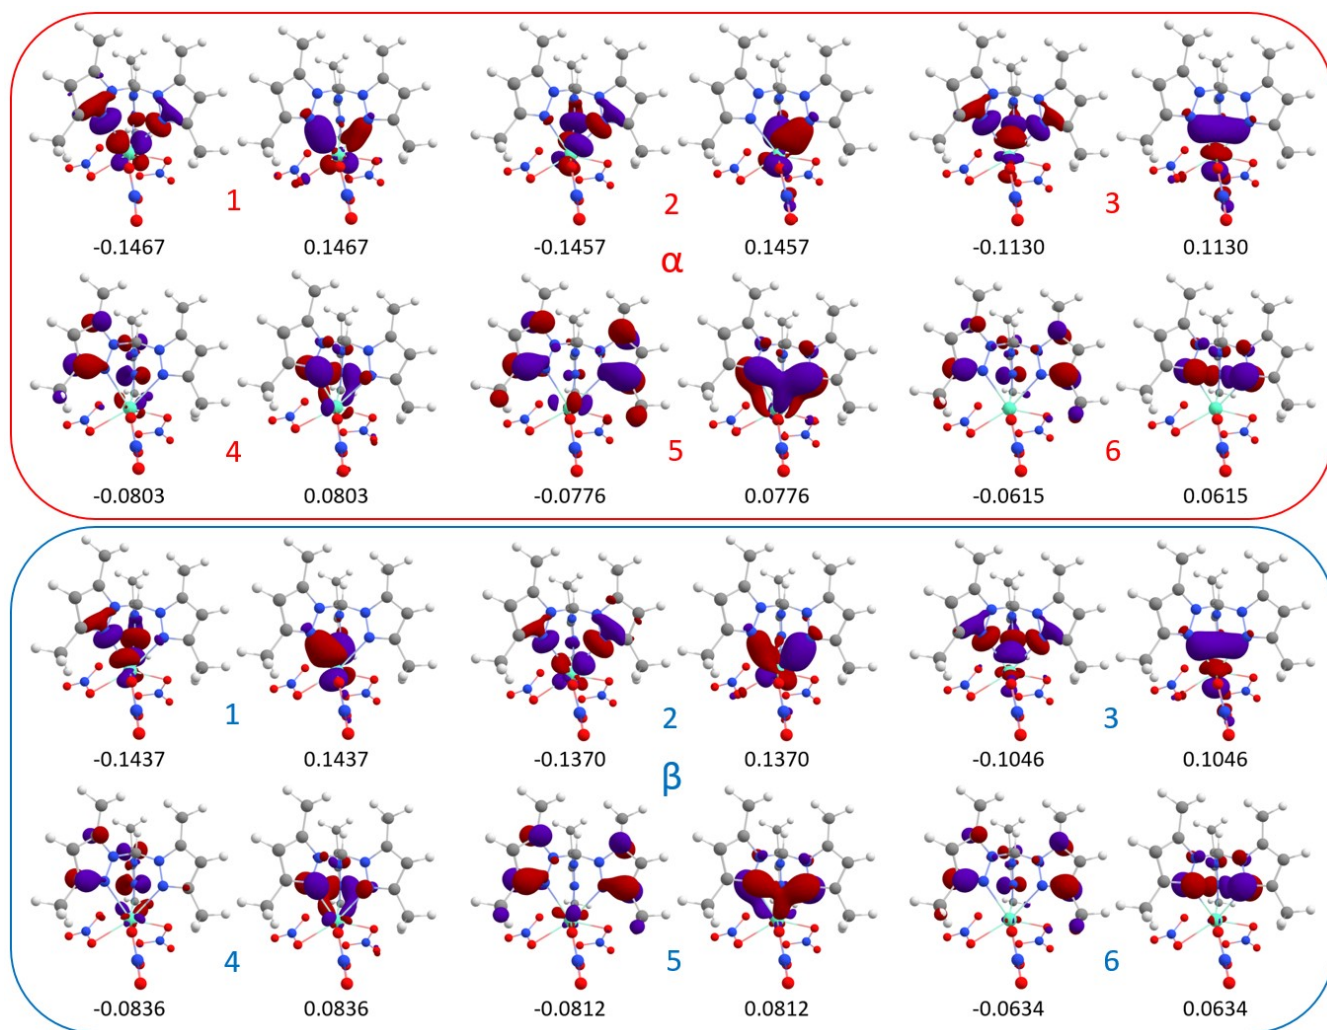

**Figure S16.** The most important pairs of  $\alpha$  and  $\beta$  NOCVs responsible for  $\sigma$  (top row) and  $\pi$  (bottom row) type bonding in  $[\text{Eu}(\text{Tpm})(\text{NO}_3)_3]$  complex with their eigenvalues. Each pair of NOCVs corresponds to two orbitals with positive and negative eigenvalues of the same magnitude.

**Table S9.** Contributions from the six most important NOCVs to  $\Delta E_{orb}$  calculated for  $[\text{EuRad}(\text{NO}_3)_3]$  (**1**) and  $[\text{Eu}(\text{Tpm})(\text{NO}_3)_3]$  (**2**) complexes in  $\text{kJ mol}^{-1}$ .

|          |          | <b>1</b> | <b>2</b> | <b>3</b> | <b>4</b> | <b>5</b> | <b>6</b> | $\Delta E_{orb}(\alpha \text{ or } \beta)$ |
|----------|----------|----------|----------|----------|----------|----------|----------|--------------------------------------------|
| <b>1</b> | $\alpha$ | -33.5    | -30      | -18.1    | -8.3     | -5.2     | -3.9     | -132.5                                     |
|          | $\beta$  | -33      | -27.7    | -16      | -5.6     | -6       | -3.8     | -123.1                                     |
| <b>2</b> | $\alpha$ | -27.1    | -26.7    | -18.3    | -5.2     | -4.9     | -3.3     | -123.8                                     |
|          | $\beta$  | -26.5    | -24.8    | -16.5    | -5.6     | -5.4     | -3.5     | -120.0                                     |

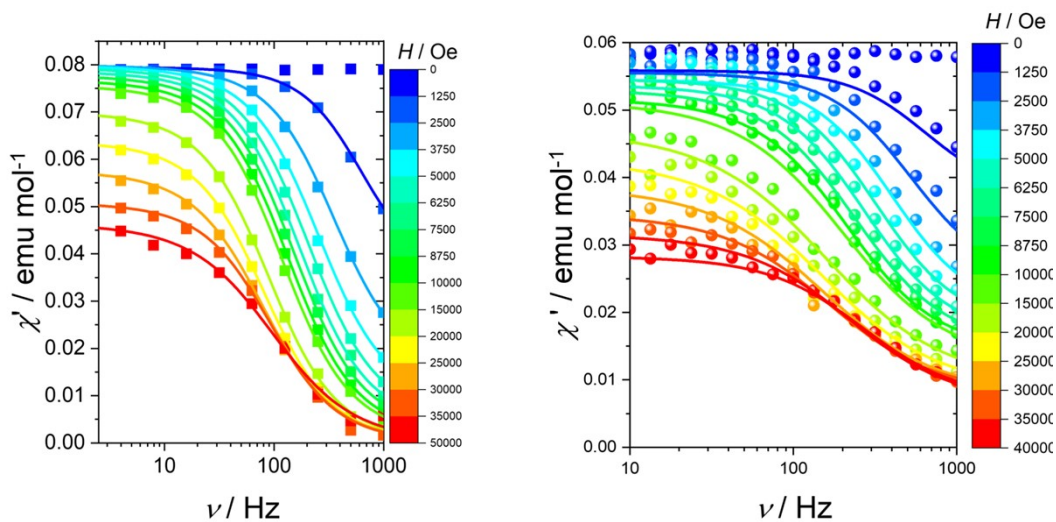

**Figure S17.** In-phase component of the ac magnetic susceptibility of Lu (left) and Eu (right). Field scan at  $T = 2$  K.

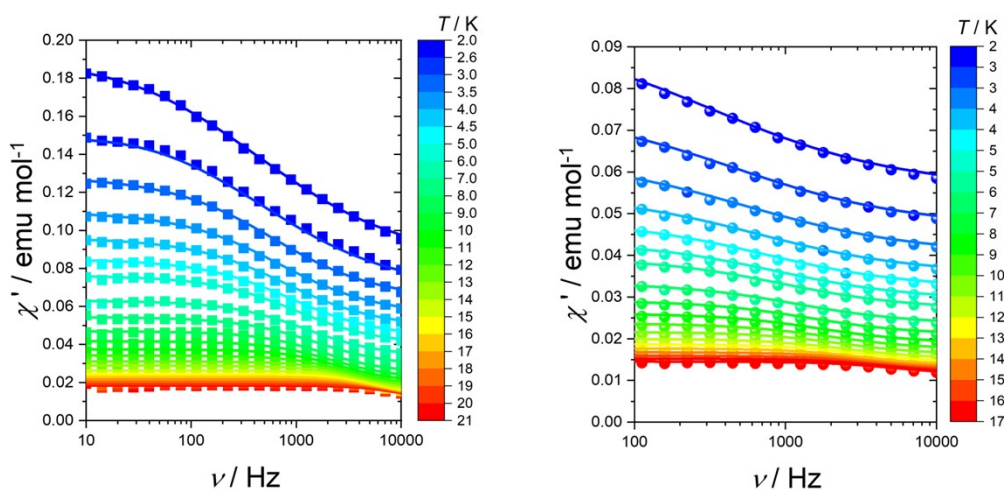

**Figure S18.** In-phase component of the ac magnetic susceptibility of Lu (left) and Eu (right). Temperature scan at  $H = 1000$  Oe.

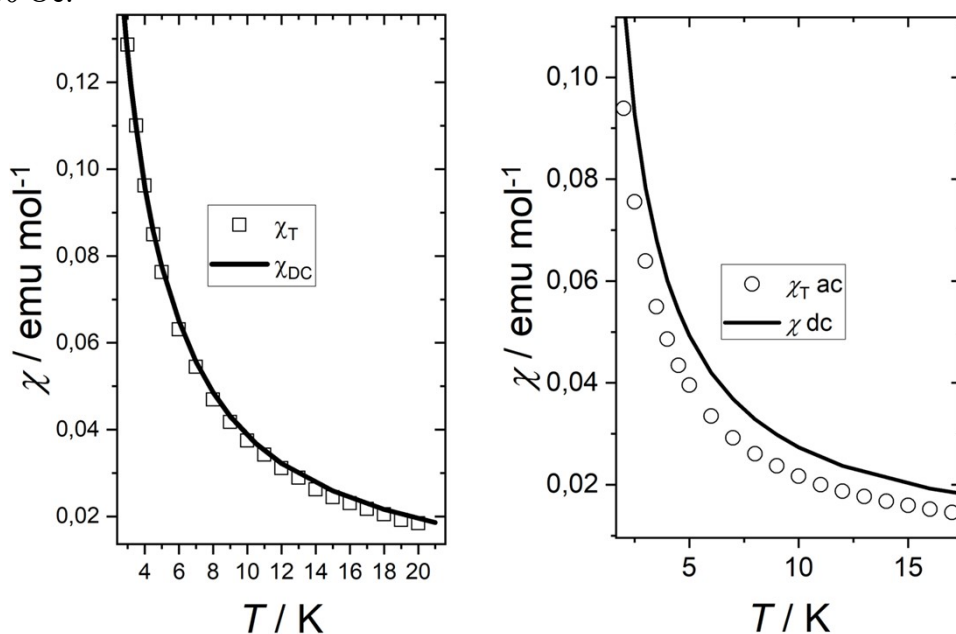

**Figure S19.** Comparison between the dc susceptibility and the isothermal value of the ac susceptibility obtained from the fit of the ac curves: Lu (left), Eu (right).
